# Supplementary material
Source: PubMed Central journal article supplement (PMC4277649)

**Supplementary Material**

**Optimizing Proteolytic Digestion Conditions for the Analysis  
of Serum Albumin Adducts of  
2-Amino-1-methyl-6-phenylimidazo[4,5-b]pyridine, a  
Potential Human Carcinogen Formed in Cooked Meat**

*Lijuan Peng<sup>1,2\*</sup> and Robert J. Turesky<sup>2,3\*</sup>*

<sup>1</sup>Department of Chemistry and Environment Engineering, Wuhan Polytechnic University,  
ChangQing Garden, Hankou, Wuhan 430023, P.R. China

<sup>2</sup>Division of Environmental Health Sciences, Wadsworth Center,  
New York State Department of Health, Albany, New York 12201, USA

<sup>3</sup>Masonic Cancer Center and Department of Medicinal Chemistry, Cancer and Cardiology  
Research Building, 2231 6th Street, University of Minnesota, Minneapolis, MN 55455

\* Address correspondence to:

Robert J. Turesky  
Phone: 612-626-0141  
Fax: 612-624-3869  
E-mail : [Rturesky@umn.edu](mailto:Rturesky@umn.edu)

Lijuan Peng  
Phone: +86 2783956442  
Fax: +86 2783956442  
E-mail : [lijuan\\_peng@hotmail.com](mailto:lijuan_peng@hotmail.com)

**Figure S-1.** ESI/MS product ion spectra of (A) LQQC\*PF (C-[SO<sub>2</sub>]-PhIP sulfonamide [M+H]<sup>+</sup> at *m/z* 989.5), (B) QQC\*PF (C-[SO<sub>2</sub>]-PhIP sulfonamide [M+H]<sup>+</sup> at *m/z* 876.3), and (C) QC\*PF (C-[SO<sub>2</sub>]-PhIP sulfonamide [M+H]<sup>+</sup> at *m/z* 748.2).

**Figure S-2.** Reconstructed ion chromatograms of Cys<sup>34</sup> peptide adducts recovered from *m*-CPBA oxidized HONH-PhIP-modified SA digests, following (A) Pronase E digestion at a protease:SA ratio of 1:2; (B) Pronase E digestion at a protease:SA ratio of 1:10; and (C) Pronase E/leucine aminopeptidase/prolidase digestion.

**Figure S-3.** UPLC-ESI/MS<sup>2</sup> chromatograms of (A) 24 fmol of LQQCPFEDHVK ([M+3H]<sup>3+</sup> at *m/z* 488.6); (B) 24 fmol of LQQCPF ([M+H]<sup>+</sup> at *m/z* 735.3); (C) 15 fmol of LQQC\*PFEDHVK (C-[SO<sub>2</sub>]-PhIP sulfonamide ([M+3H]<sup>3+</sup> at *m/z* 533.7); and (D) 15 fmol of LQQC\*PF (C-[SO<sub>2</sub>]-PhIP sulfonamide ([M+H]<sup>+</sup> at *m/z* 989.5).

**Figure S-4.** UPLC-ESI/MS<sup>2</sup> chromatograms of LQQC\*PFEDHVK and LQQC\*PF adducts recovered from trypsin/chymotrypsin digestions of 225 fmol IAA alkylated SA, 225 fmol *m*-CPBA oxidized SA and 450 fmol *m*-CPBA oxidized HONH-PhIP-modified SA digests, without or with denaturation of SA.

**Figure S-5.** Reconstructed ion chromatograms of LQQC\*PFEDHVK (C-[SO<sub>2</sub>]-PhIP sulfonamide and LQQC\*PF (C-[SO<sub>2</sub>]-PhIP) sulfonamide recovered from 1.5 pmol of *m*-CPBA oxidized HONH-PhIP-modified SA digests by (A) sequence grade trypsin and

chymotrypsin from Promega and (B) biochemical grade enzymes from Sigma.

Figure S-1.

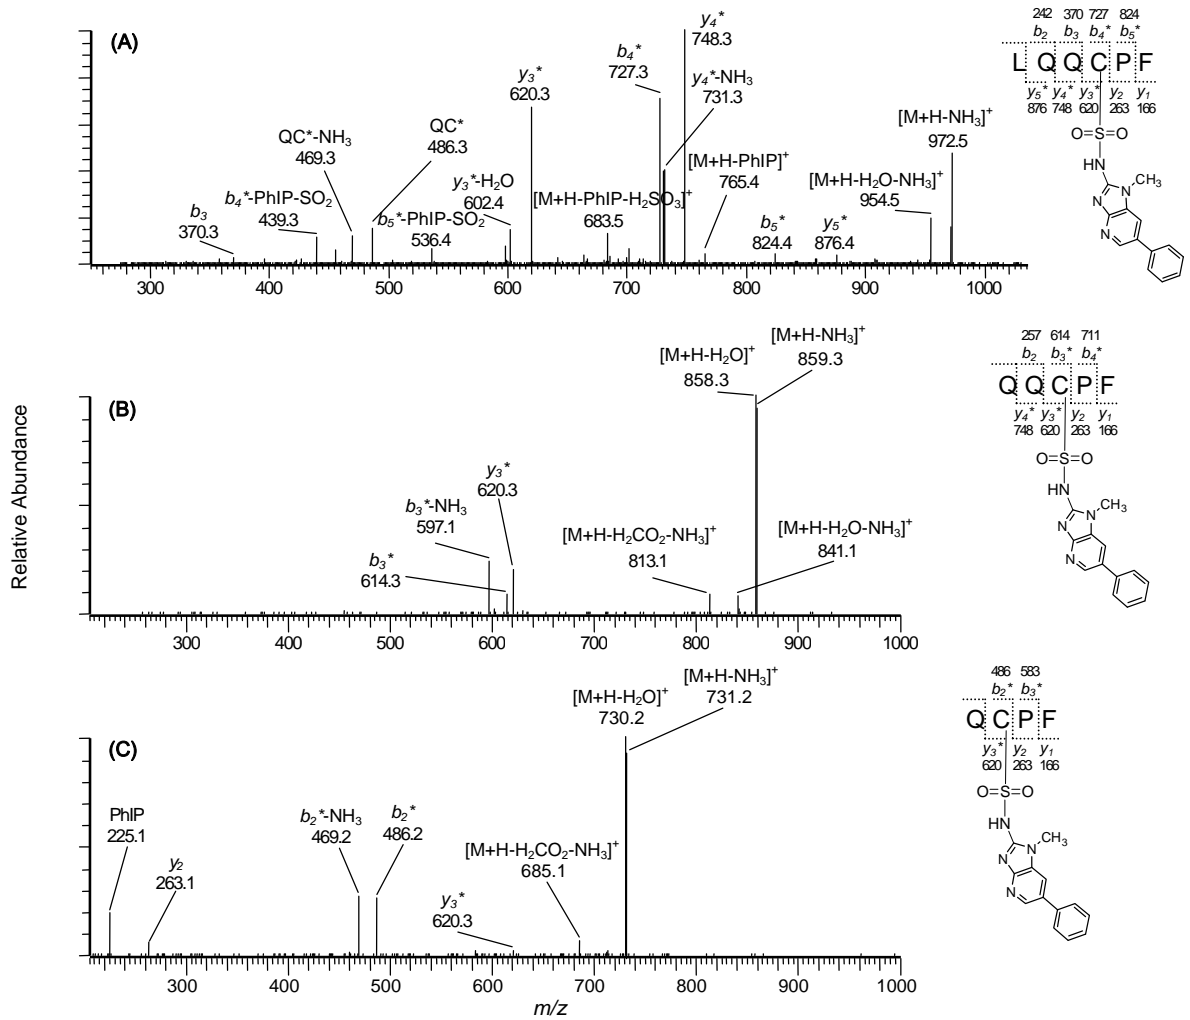

Figure S-2.

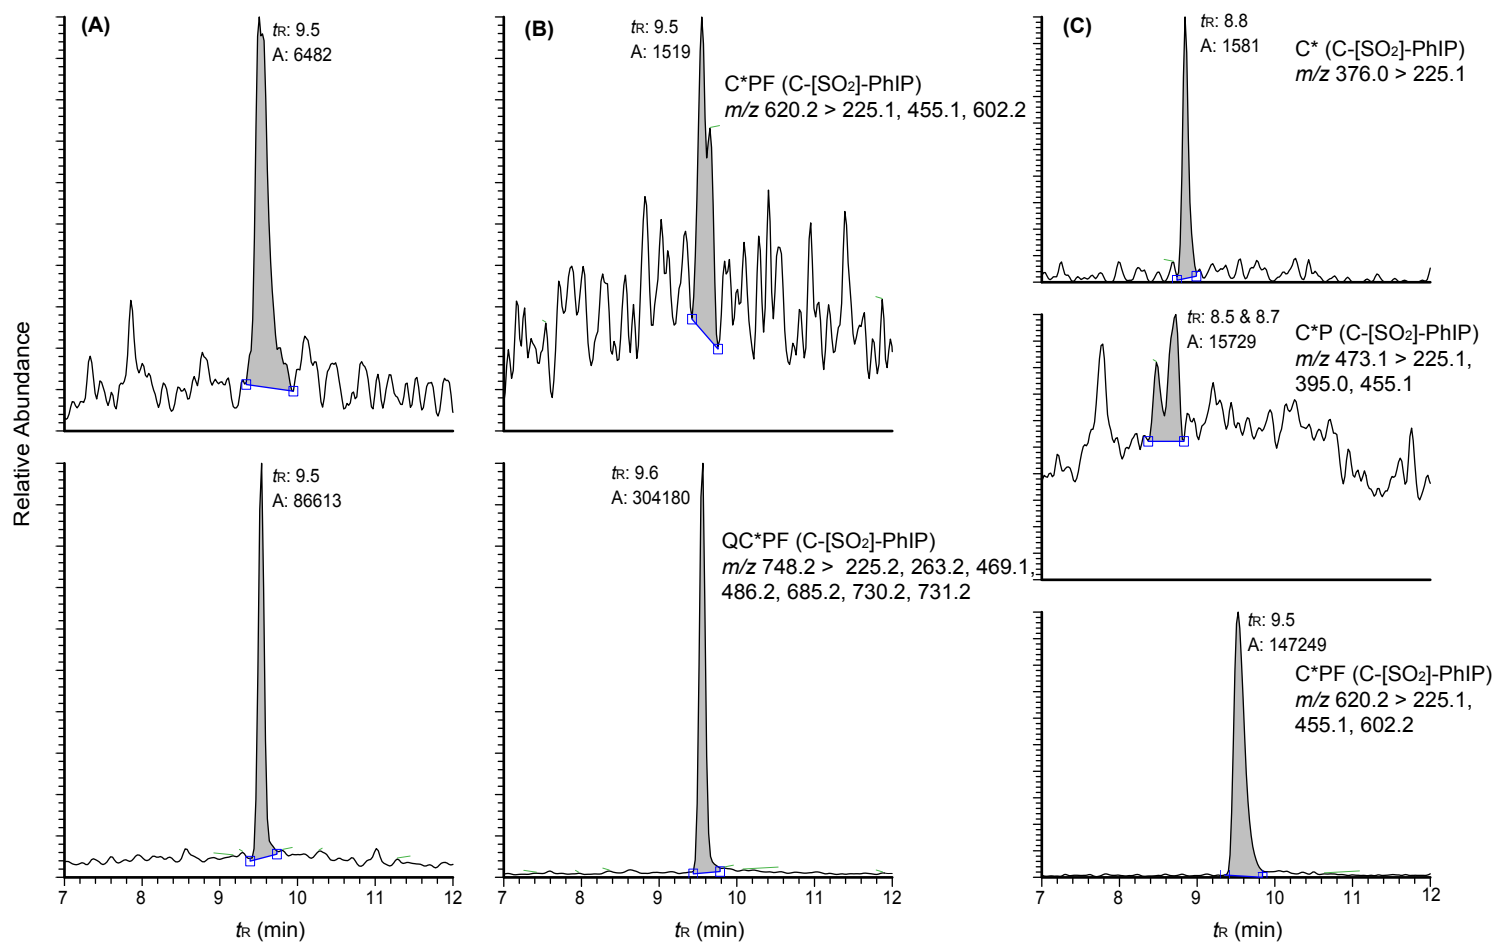

**Figure S-3.**

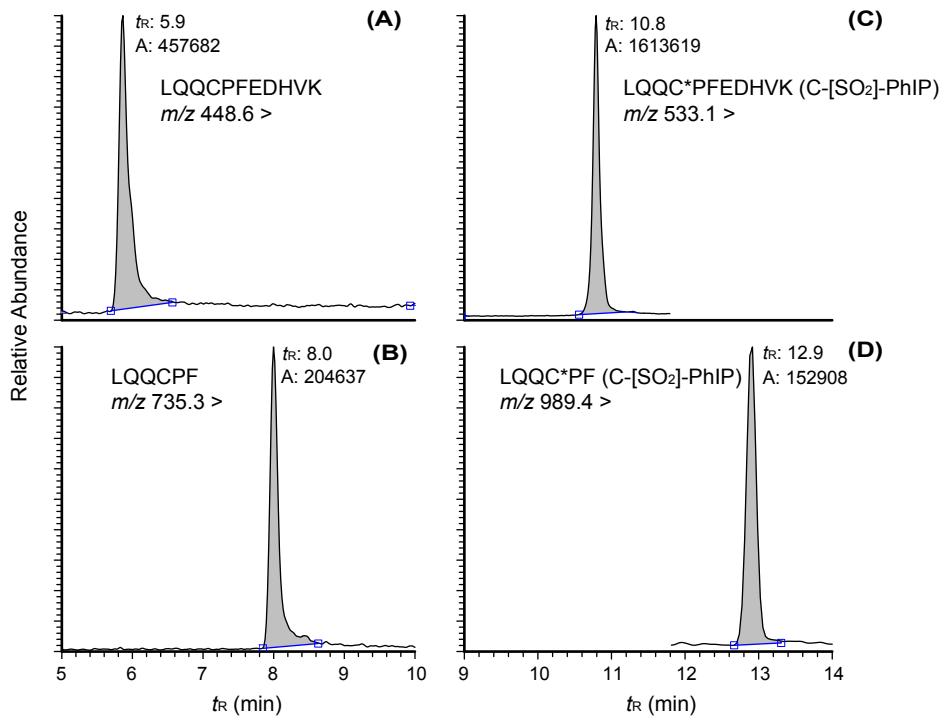

Figure S-4.

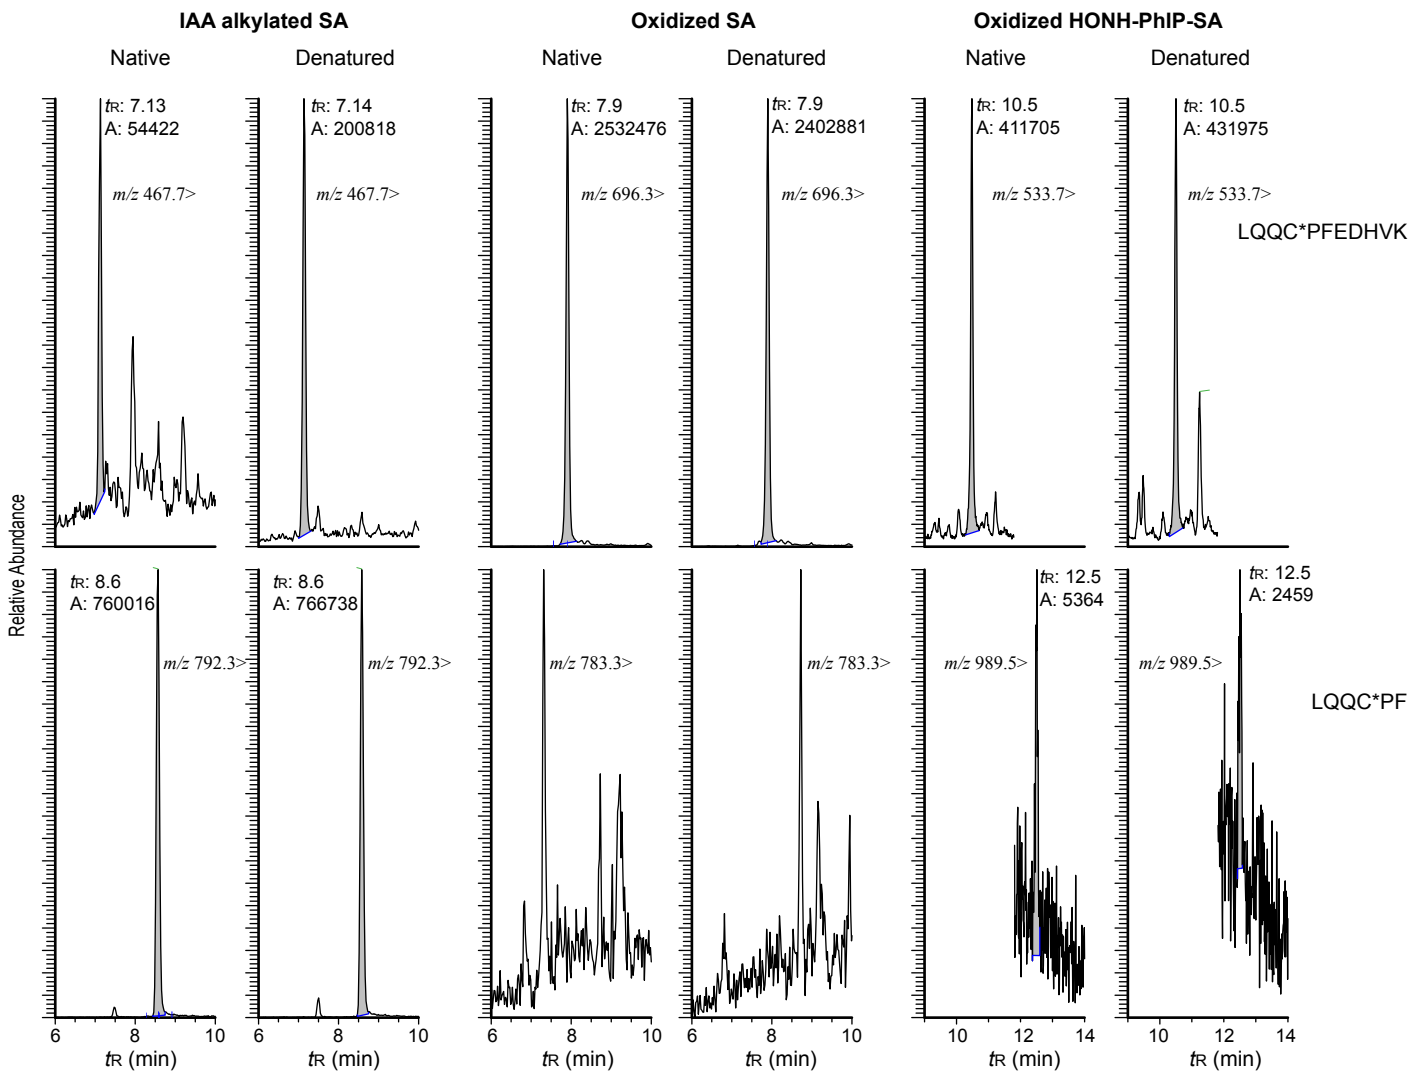

Figure S-5.

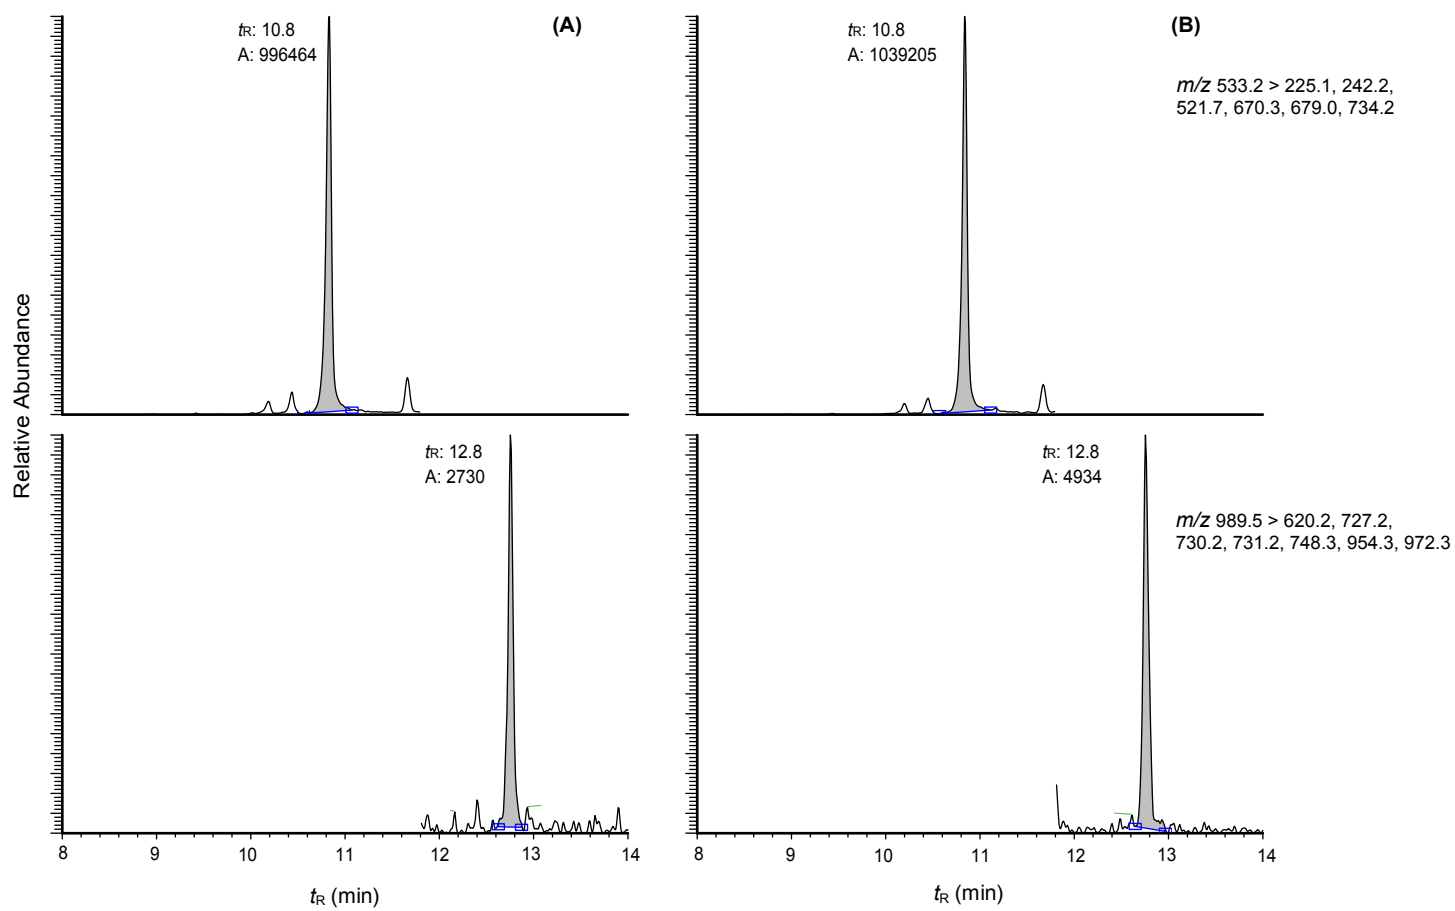

Supplement: NIHMS581553-supplement-01.pdf [file NIHMS581553-supplement-01.pdf]
